# Supplementary material for: Quantifying randomness in real networks
Source: PubMed Central journal article supplement (PMC4667701; doi:10.1038/ncomms9627), 2015-10-20
Supplement: ncomms9627-s1.pdf [file ncomms9627-s1.pdf]

# Supplementary Information

## Supplementary Figures

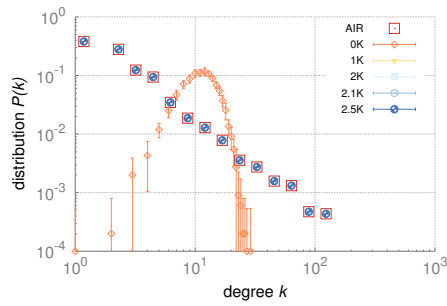

(a) AIR

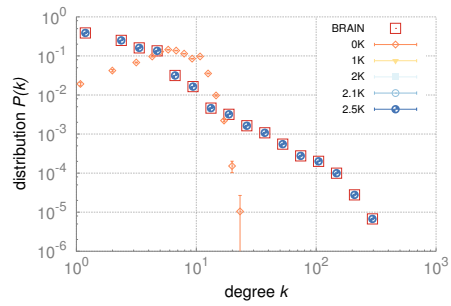

(b) BRAIN

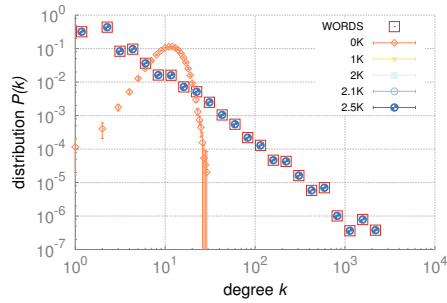

(c) WORDS

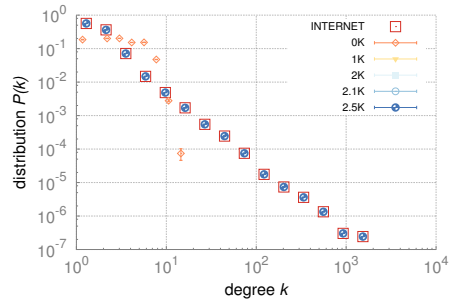

(d) INTERNET

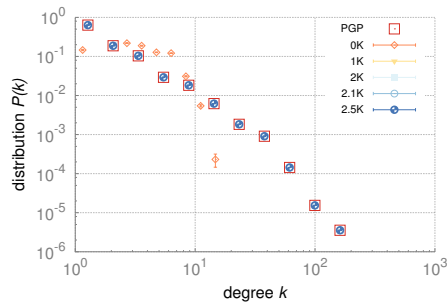

(e) PGP

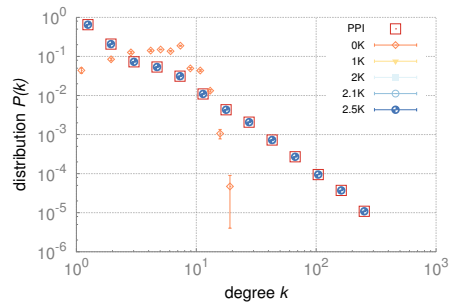

(f) PPI

Supplementary Figure 1: Degree distributions in real networks and their  $dk$ -randomizations.

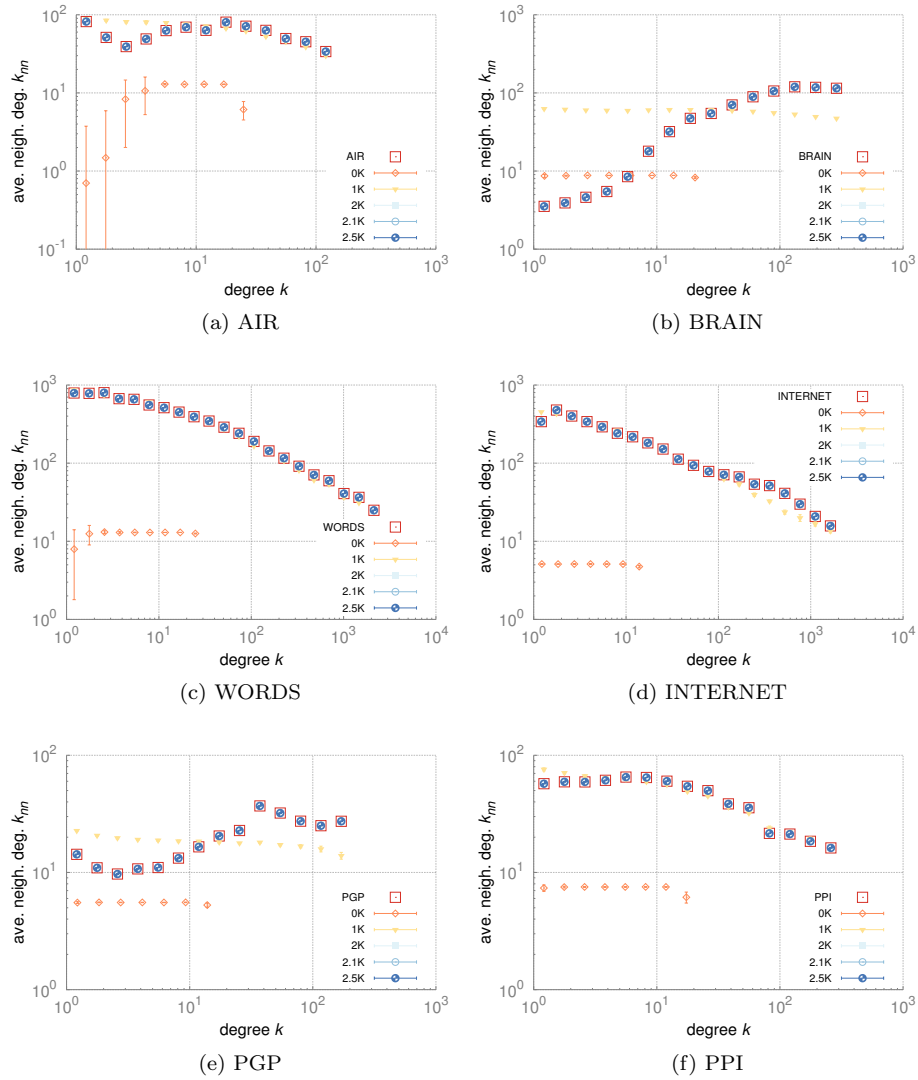

Supplementary Figure 2: Average nearest neighbor degrees (ANNDs) of nodes of a given degree in real networks and their  $dk$ -randomizations.

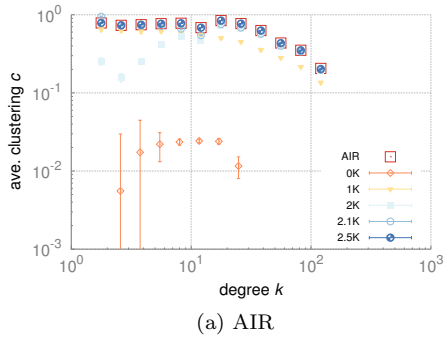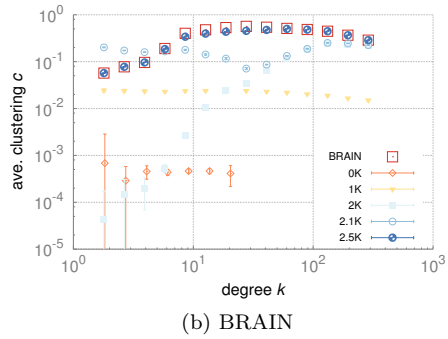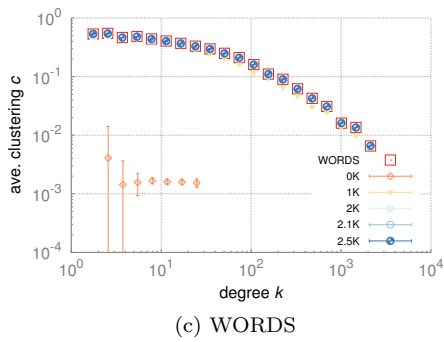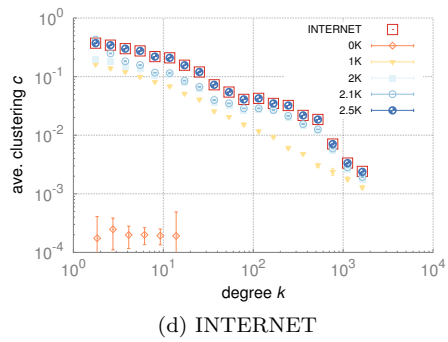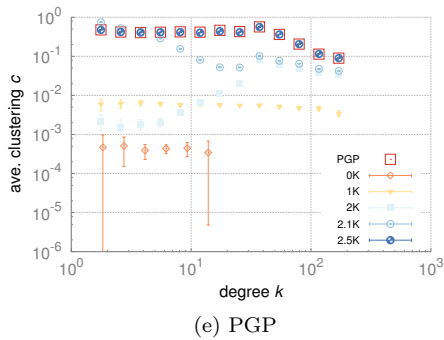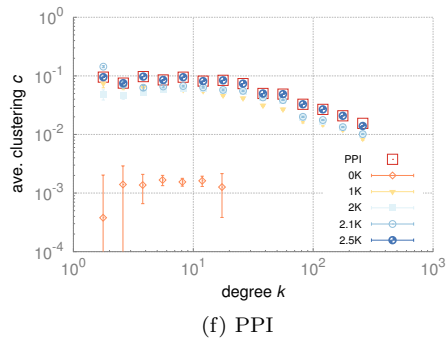

Supplementary Figure 3: Average clustering of nodes of a given degree in real networks and their  $dk$ -randomizations.

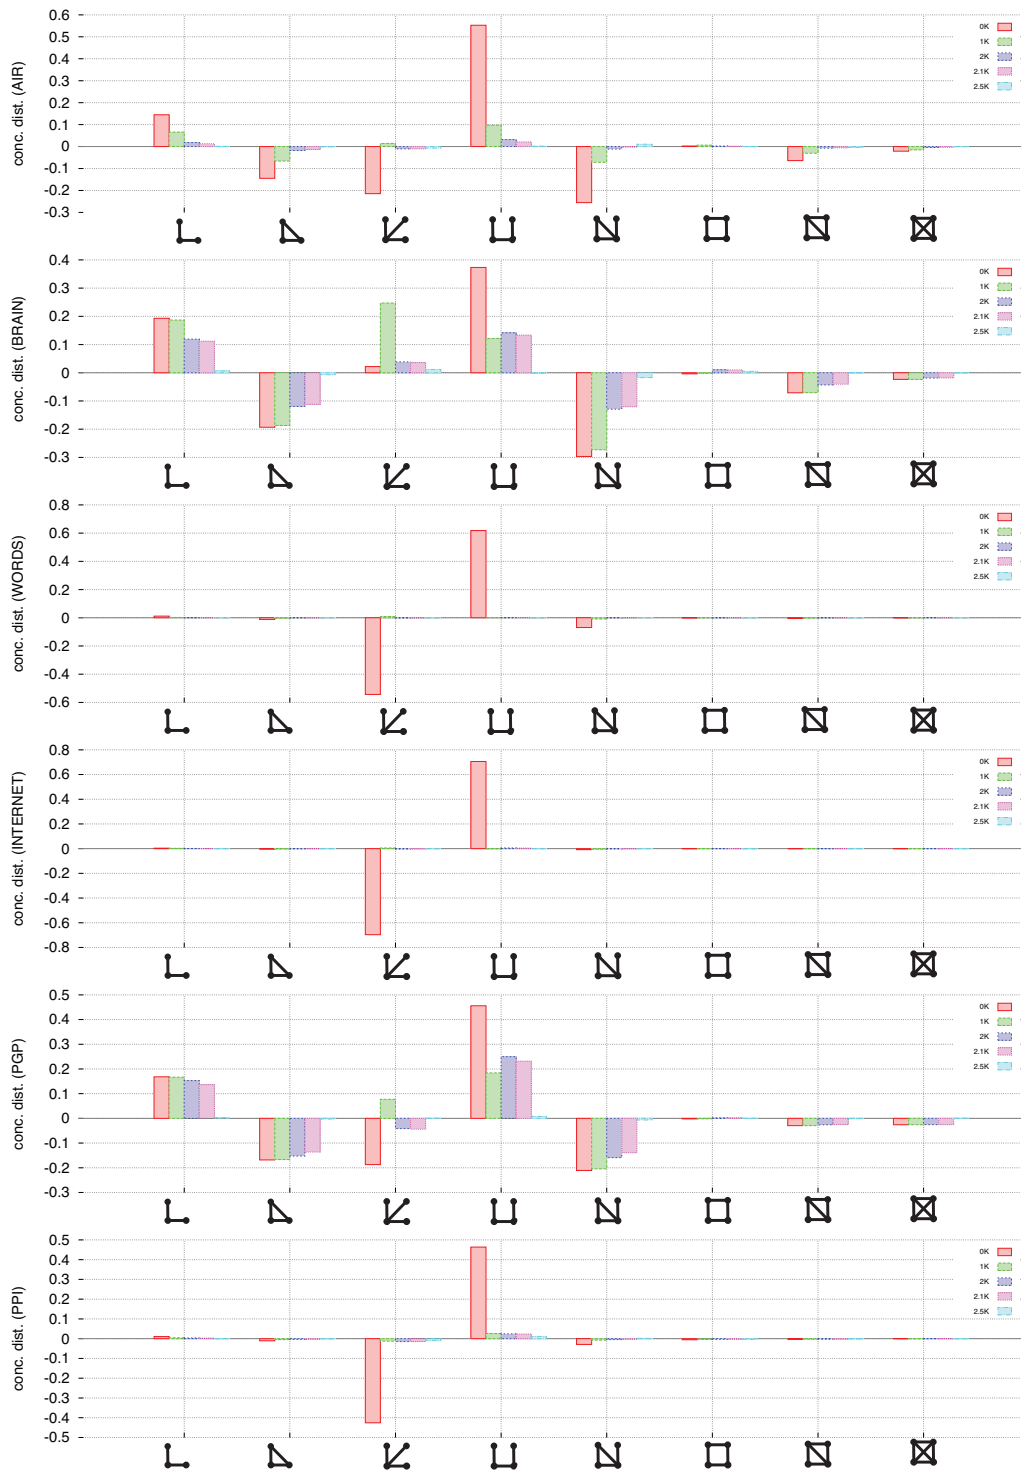

Supplementary Figure 4: Subgraph concentration differences between  $dk$ -randomizations and real networks.

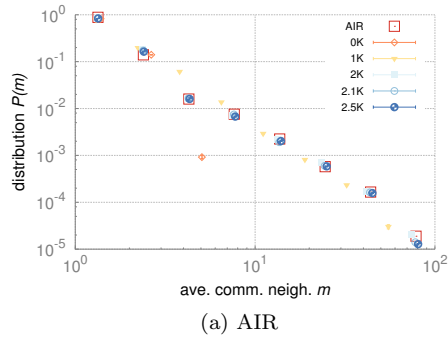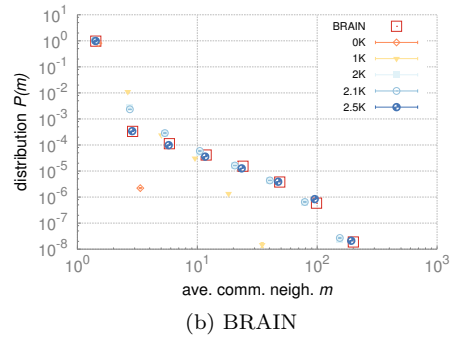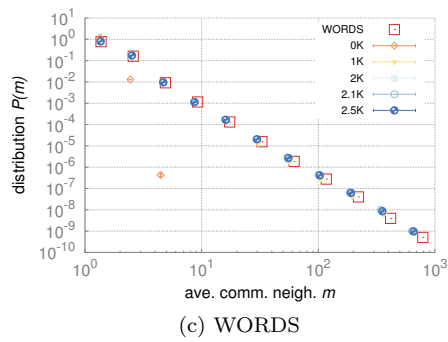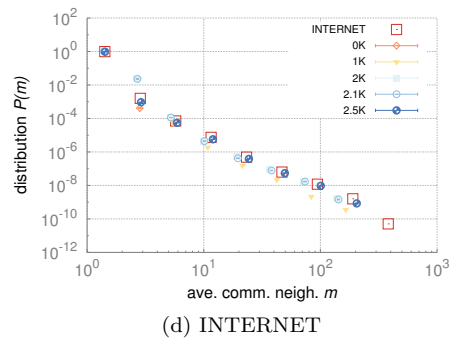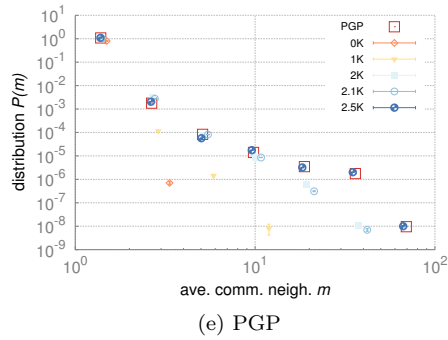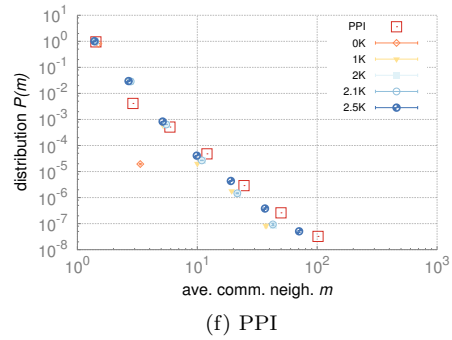

Supplementary Figure 5: Common neighbor distributions in real networks and their  $dk$ -randomizations.

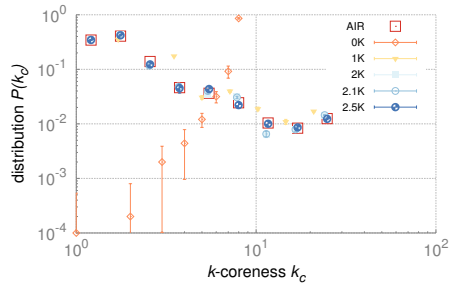

(a) AIR

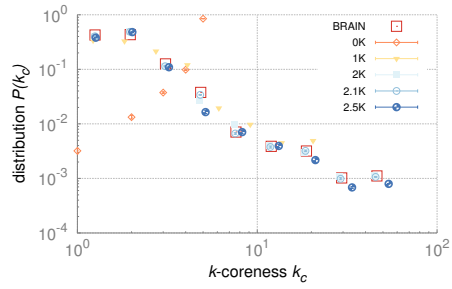

(b) BRAIN

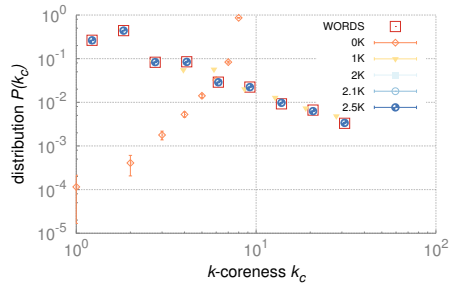

(c) WORDS

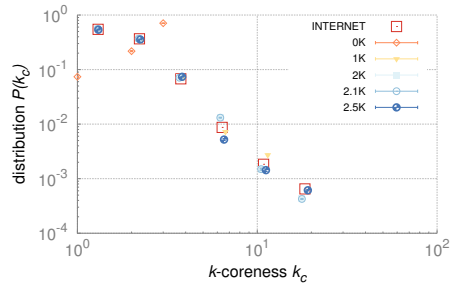

(d) INTERNET

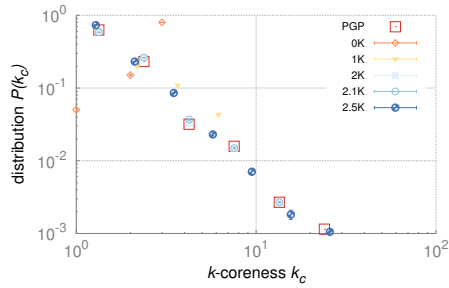

(e) PGP

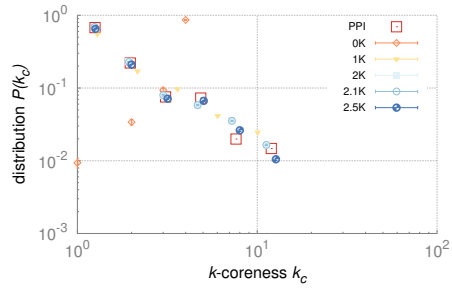

(f) PPI

Supplementary Figure 6:  $k$ -coreness distributions in real networks and their  $dk$ -randomizations.

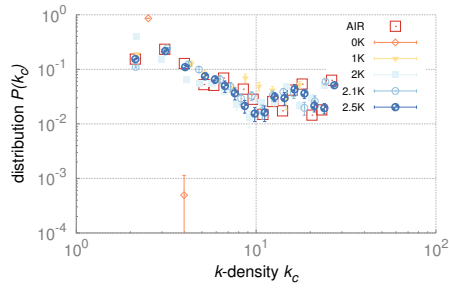

(a) AIR

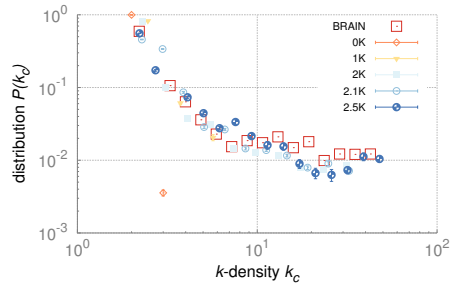

(b) BRAIN

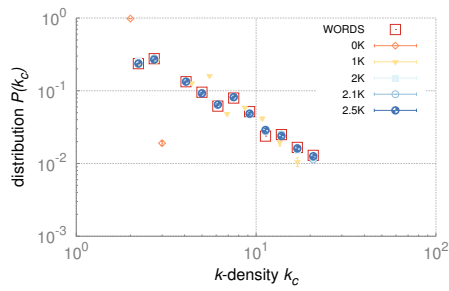

(c) WORDS

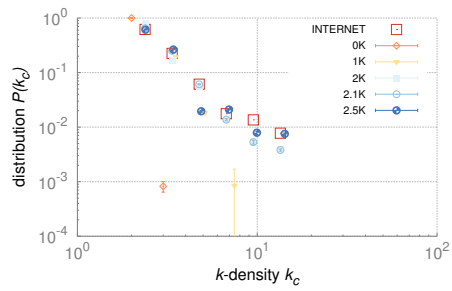

(d) INTERNET

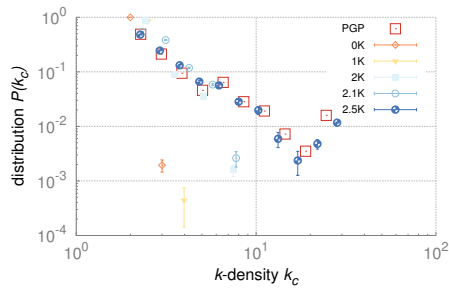

(e) PGP

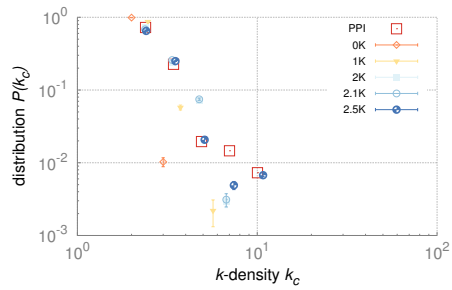

(f) PPI

Supplementary Figure 7:  $k$ -denseness distributions in real networks and their  $dk$ -randomizations.

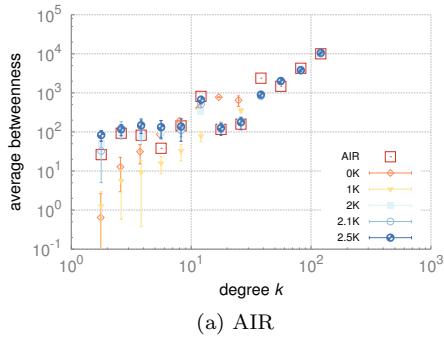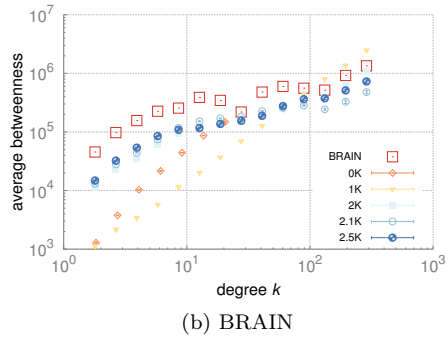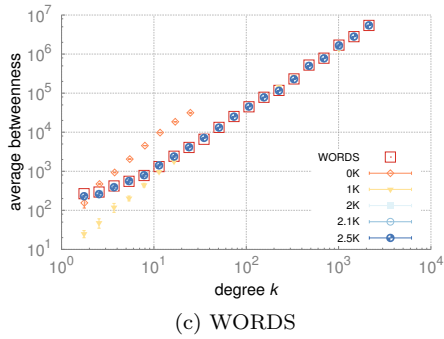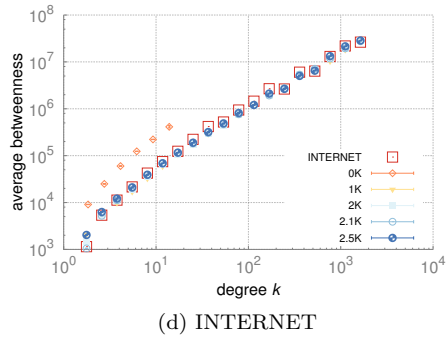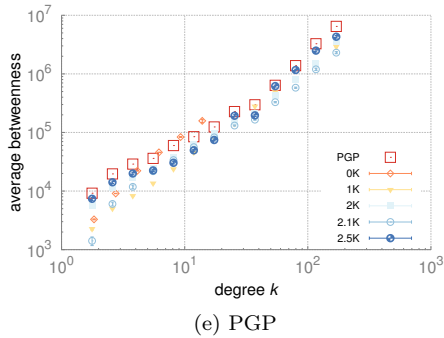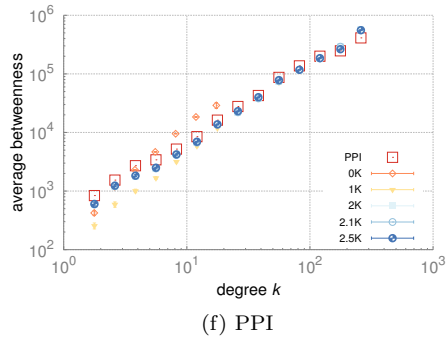

Supplementary Figure 8: **Average betweenness of nodes of a given degree in real networks and their  $dk$ -randomizations.**



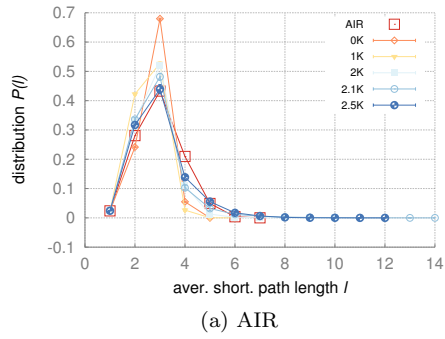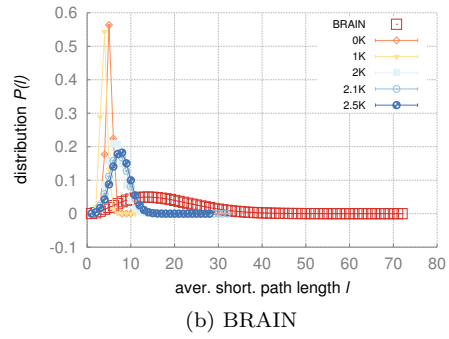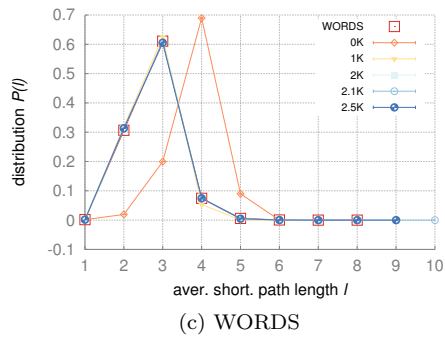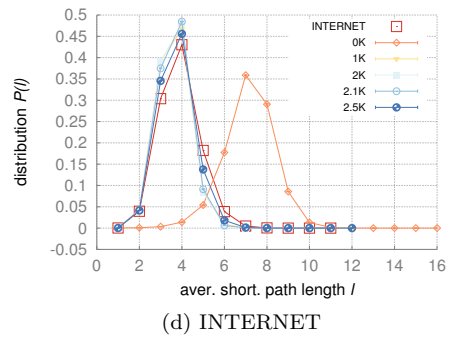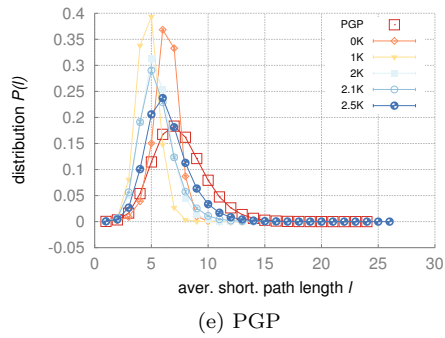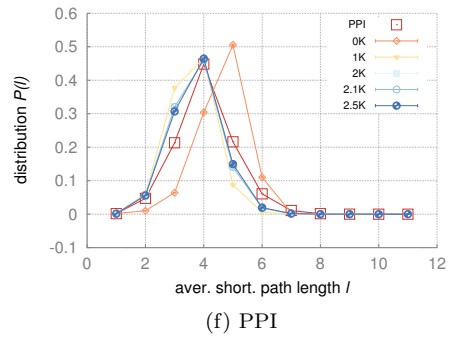

Supplementary Figure 9: **Shortest path distance distributions in real networks and their  $dk$ -randomizations.**

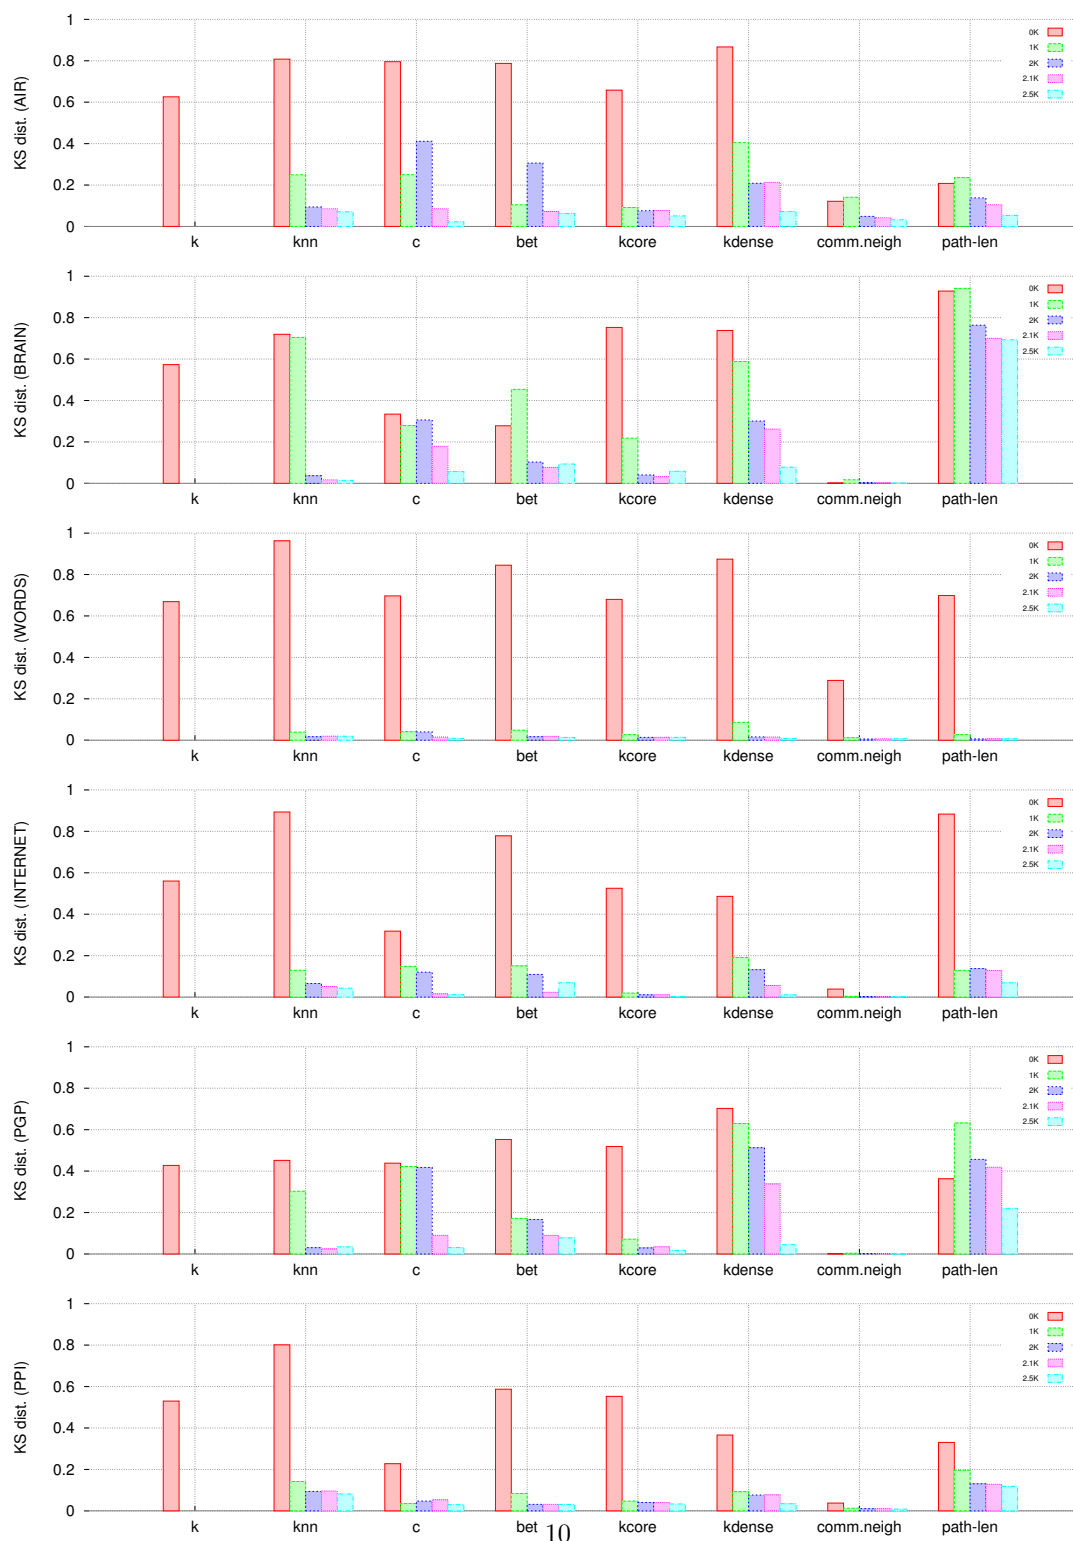

Supplementary Figure 10: Kolmogorov-Smirnov distances between real networks and their  $dk$ -randomizations.

## Supplementary Tables

Supplementary Table 1: **Largest eigenvalues, averaged across different realizations for each  $d$ , and their standard deviations in parentheses.**

|          | Original | $0k$        | $1k$         | $2k$         | $2.1k$       | $2.5k$       |
|----------|----------|-------------|--------------|--------------|--------------|--------------|
| AIR      | 48.07    | 12.97(0.08) | 42.41(0.24)  | 47.46(0.01)  | 47.51(0.02)  | 47.82(0.03)  |
| BRAIN    | 119.66   | 8.91(0.01)  | 54.89(0.26)  | 113.41(0.02) | 114.09(0.06) | 122.27(0.20) |
| WORDS    | 109.44   | 13.06(0.02) | 104.12(0.28) | 108.82(0.03) | 108.80(0.04) | 108.92(0.02) |
| INTERNET | 67.17    | 5.36(0.01)  | 56.02(0.33)  | 61.15(0.03)  | 61.32(0.06)  | 65.34(0.10)  |
| PGP      | 42.44    | 5.77(0.02)  | 19.50(0.24)  | 34.08(0.03)  | 34.40(0.05)  | 42.95(0.12)  |
| PPI      | 38.56    | 8.05(0.05)  | 32.47(0.17)  | 34.07(0.04)  | 34.05(0.04)  | 35.56(0.10)  |

Supplementary Table 2: **Spectral gaps, averaged across different realizations for each  $d$ , and their standard deviations in parentheses.**

|          | Original | $0K$       | $1K$        | $2K$        | $2.1K$      | $2.5K$      |
|----------|----------|------------|-------------|-------------|-------------|-------------|
| AIR      | 29.34    | 6.04(0.09) | 32.61(0.46) | 37.86(0.25) | 37.21(0.21) | 30.93(0.29) |
| BRAIN    | 40.97    | 2.90(0.06) | 35.52(0.31) | 77.53(0.11) | 76.59(0.27) | 42.71(0.35) |
| WORDS    | 65.31    | 5.86(0.02) | 65.28(0.51) | 68.53(0.14) | 68.47(0.12) | 68.21(0.15) |
| INTERNET | 17.56    | 0.70(0.05) | 14.94(0.53) | 18.83(0.07) | 18.55(0.11) | 19.53(0.25) |
| PGP      | 4.25     | 0.98(0.04) | 5.51(0.31)  | 18.01(0.18) | 17.55(0.21) | 4.71(0.19)  |
| PPI      | 11.69    | 2.25(0.07) | 15.75(0.27) | 16.44(0.19) | 16.28(0.20) | 10.76(0.17) |

Supplementary Table 3: **The considered networks, their abbreviations, and the numbers of nodes and links in them.**

| Network                           | Abbr.    | $N$    | $M$    |
|-----------------------------------|----------|--------|--------|
| US air transportation network [1] | AIR      | 500    | 2,980  |
| Brain network [2]                 | BRAIN    | 17,455 | 67,895 |
| English word network [3]          | WORDS    | 7,377  | 44,205 |
| Internet AS-level [4]             | INTERNET | 20,906 | 42,994 |
| PGP web of trust [5]              | PGP      | 10,680 | 24,316 |
| Protein interaction network [6]   | PPI      | 4,099  | 13,355 |

Supplementary Table 4: **Parameters used for the  $dk$ -randomization (left) and  $2.1k/2.5k$ -targeting  $2k$ -preserving (right) rewiring processes ( $M$  the number of edges in the real network,  $\bar{c}$  average clustering,  $\bar{c}(k)$  average clustering of nodes of degree  $k$ ).**

| $G_T$    | $dk$ -randomization |       | $p$ -targeting $dk$ -preserving rewiring |     |        |           |                  |                   |
|----------|---------------------|-------|------------------------------------------|-----|--------|-----------|------------------|-------------------|
|          | $R$                 | $d$   | $p_{G_T}$                                | $d$ | $R$    | $\beta_0$ | $\beta_{factor}$ | $\alpha$          |
| AIR      | $100M$              | $1/2$ | $\bar{c}, \bar{c}(k)$                    | 2   | $10M$  | $10^{-2}$ | 1.4              | $5 \cdot 10^{-4}$ |
| BRAIN    | $100M$              | $1/2$ | $\bar{c}, \bar{c}(k)$                    | 2   | $10M$  | $10^{-2}$ | 1.1              | $5 \cdot 10^{-5}$ |
| WORDS    | $100M$              | $1/2$ | $\bar{c}, \bar{c}(k)$                    | 2   | $10M$  | $10^{-2}$ | 1.4              | $5 \cdot 10^{-4}$ |
| INTERNET | $100M$              | $1/2$ | $\bar{c}, \bar{c}(k)$                    | 2   | $10M$  | $10^{-2}$ | 1.4              | $5 \cdot 10^{-4}$ |
| PGP      | $100M$              | $1/2$ | $\bar{c}, \bar{c}(k)$                    | 2   | $100M$ | $10^{-2}$ | 1.1              | $5 \cdot 10^{-7}$ |
| PPI      | $100M$              | $1/2$ | $\bar{c}, \bar{c}(k)$                    | 2   | $200M$ | $10^{-2}$ | 1.1              | $5 \cdot 10^{-7}$ |

Supplementary Table 5:  $dk$ -series vs.  $d$ -series

| $d$ | $dk$ -statistics         | $d$ -statistics |
|-----|--------------------------|-----------------|
| 0   | $k$                      | -               |
| 1   | $N(k)$                   | $\bar{N}$       |
| 2   | $N(k, k')$               | $M$             |
| 3   | $N_{\wedge}(k, k', k'')$ | $W$             |
|     | $N_{\Delta}(k, k', k'')$ | $T$             |

## Supplementary Notes

### Supplementary Note 1: Network properties

Here we describe all the network properties measured and discussed in Supplementary Note 3 and, where meaningful, their relations to  $dk$ -series.

#### 1.1 Degree distribution

The distribution  $P(k)$  of node degrees  $k$ , i.e., the  $1k$ -distribution, is:

$$P(k) = \frac{N(k)}{N}, \quad (1)$$

where  $N(k)$  is the number of nodes of degree  $k$  in the network, and  $N$  is the total number of nodes in it, so that  $P(k)$  is normalized,  $\sum_k P(k) = 1$ . The  $1k$ -distribution fully defines the  $0k$ -distribution, i.e., the average degree  $\bar{k}$  in the network, by

$$\bar{k} = \sum_k kP(k), \quad (2)$$

but not *vice versa*.

#### 1.2 Average nearest neighbor degree (ANND)

The average degree  $\bar{k}_{nn}(k)$  of nearest neighbors of nodes of degree  $k$  is a commonly used projection of the joint degree distribution (JDD)  $P(k, k')$ , i.e., the  $2k$ -distribution. The JDD is defined as

$$P(k, k') = \mu(k, k') \frac{N(k, k')}{2M}, \quad (3)$$

where  $N(k, k') = N(k', k)$  is the number of links between nodes of degrees  $k$  and  $k'$  in the network,  $M$  is the total number of links in it, and

$$\mu(k, k') = \begin{cases} 2 & \text{if } k = k', \\ 1 & \text{otherwise,} \end{cases} \quad (4)$$

so that  $P(k, k')$  is normalized,  $\sum_{k, k'} P(k, k') = 1$ . The  $2k$ -distribution fully defines the  $1k$ -distribution by

$$P(k) = \frac{\bar{k}}{k} \sum_{k'} P(k, k'), \quad (5)$$

but not *vice versa*. The average neighbor degree  $\bar{k}_{nn}(k)$  is a projection of the  $2k$ -distribution  $P(k, k')$  via

$$\bar{k}_{nn}(k) = \frac{\bar{k}}{kP(k)} \sum_{k'} k' P(k, k') = \frac{\sum_{k'} k' P(k, k')}{\sum_{k'} P(k, k')}. \quad (6)$$

### 1.3 Clustering

Clustering of node  $i$  is the number of triangles  $\Delta_i$  it belongs to, or equivalently the number of links among its neighbors, divided by the maximum such number, which is  $k(k-1)/2$ , where  $k$  is  $i$ 's degree,  $\deg(i) = k$ . The average clustering coefficient of the network is

$$\bar{c} = \frac{1}{N} \sum_i \frac{\Delta_i}{k_i(k_i-1)/2} \quad (7)$$

Averaging over all nodes of degree  $k$ , the degree-dependent clustering is

$$\bar{c}(k) = \frac{2\Delta(k)}{k(k-1)N(k)}, \text{ where } \Delta(k) = \sum_{i: \deg(i)=k} \Delta_i. \quad (8)$$

The degree-dependent clustering is a commonly used projection of the  $3k$ -distribution. (See [7, 8] for an alternative formalism involving three point correlations.) The  $3k$ -distribution is actually two distributions characterizing the concentrations of the two non-isomorphic degree-labeled subgraphs of size 3, wedges and triangles:

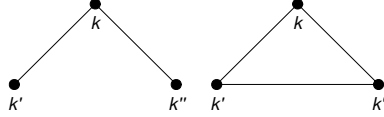

Let  $N_{\wedge}(k', k, k'') = N_{\wedge}(k'', k, k')$  be the number wedges involving nodes of degrees  $k, k'$ , and  $k''$ , where  $k$  is the central node degree, and let  $N_{\Delta}(k, k', k'')$  be the number of triangles consisting of nodes of degrees  $k, k'$ , and  $k''$ , where  $N_{\Delta}(k, k', k'')$  is assumed to be symmetric with respect to all permutations of its arguments. Then the two components of the  $3K$ -distribution are

$$P_{\wedge}(k', k, k'') = \mu(k', k'') \frac{N_{\wedge}(k', k, k'')}{2W}, \quad (9)$$

$$P_{\Delta}(k, k', k'') = \nu(k, k', k'') \frac{N_{\Delta}(k, k', k'')}{6T}, \quad (10)$$

where  $W$  and  $T$  are the total numbers of wedges and triangles in the network, and

$$\nu(k, k', k'') = \begin{cases} 6 & \text{if } k = k' = k'', \\ 1 & \text{if } k \neq k' \neq k'', \\ 2 & \text{otherwise,} \end{cases} \quad (11)$$

so that both  $P_{\wedge}(k', k, k'')$  and  $P_{\Delta}(k, k', k'')$  are normalized,  $\sum_{k, k', k''} P_{\wedge}(k', k, k'') = \sum_{k, k', k''} P_{\Delta}(k, k', k'') = 1$ . The  $3k$ -distribution defines the  $2k$ -distribution (but not *vice versa*), by

$$P(k, k') = \frac{1}{k+k'-2} \sum_{k''} \left\{ \frac{6T}{M} P_{\Delta}(k, k', k'') + \frac{W}{M} [P_{\wedge}(k', k, k'') + P_{\wedge}(k, k', k'')] \right\}. \quad (12)$$

The normalization of  $2k$ - and  $3k$ -distributions implies the following identity between the numbers of triangles, wedges, edges, nodes, and the second moment of the degree distribution  $k^2 = \sum_k k^2 P(k)$ :

$$2 \frac{3T + W + M}{N} = \bar{k}^2. \quad (13)$$

The degree-dependent clustering coefficient  $\bar{c}(k)$  is the following projection of the  $3k$ -distribution

$$\bar{c}(k) = \frac{6T \sum_{k',k''} P_{\Delta}(k, k', k'')}{N k(k-1)P(k)}. \quad (14)$$

#### 1.4 Subgraph frequencies

The concentration of subgraphs of size 3 is exactly fixed only by the  $3k$ -distribution, or by the 3-distribution, Supplementary Note 4. There are two non-isomorphic connected graphs of size 3 (triangles and wedges), and their concentrations are defined as

$$C_{\wedge} = \frac{\wedge}{N_3}, \quad C_{\Delta} = \frac{\Delta}{N_3}, \quad (15)$$

where  $\wedge$  is the number of wedges in the graph,  $\Delta$  is the number of triangles in the graph, and  $N_3 = \wedge + \Delta$  is the total number of connected subgraphs of size 3 in the graph.

The concentration of subgraphs of size 4 is exactly fixed only by the  $4k$ -distribution, or by the 4-distribution. There are six non-isomorphic connected graphs of size 4,

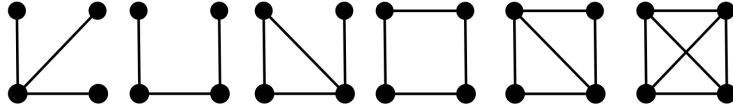

and their concentrations are defined as the number of subgraphs of a particular type divided by the total number of connected subgraphs of size 4.

In our comparisons of real networks and their  $dk$ -randomizations in Supplementary Note 3 we choose to compare the subgraph concentrations directly, versus computing  $z$ -scores, as common in the motif literature. The reasons for this decision is that  $z$ -scores are tailored for a fixed null model, while we are considered a series of null models parameterized by  $d$  in  $dk$ -series. There is nothing in the  $z$ -score and  $dk$ -series definitions that could easily provide any estimates of how fast the subgraph frequency means and standard deviations in the  $z$ -score definition converge as functions of  $d$ . Therefore the comparisons of  $z$ -scores for different values of  $d$  would be meaningless.

#### 1.5 Common neighbors

The number  $m_{ij}$  of common neighbors between two connected nodes  $i$  and  $j$  is the number of nodes to which both  $i$  and  $j$  are connected, or equivalently the

multiplicity of edge  $(i, j)$ :

$$m_{ij} = \sum_l A_{il} A_{lj} A_{ij}, \quad (16)$$

where  $\{A_{ij}\}$  is the adjacency matrix of the graph. The distribution  $P(m)$  of the number of common neighbors  $m$  is then

$$P(m) = \frac{\sum_{i < j} \delta_{m_{ij}, m}}{N(N-1)/2}, \quad (17)$$

where  $\delta$  is the Kronecker delta. The common neighbor distribution is thus the probability that two connected nodes in the graph have  $m$  common neighbors. This property is exactly fixed only by the  $3k$ -distribution.

### 1.6 $k$ -coreness and $k$ -denseness

The  $k$ -core decomposition [9] of a graph is a set of nested subgraphs induced by nodes of the same  $k$ -coreness. A node has  $k$ -coreness equal to  $k$  if it belongs to a maximal connected subgraph of the original graph, in which all nodes have degree at least  $k$ , i.e., in which each node is connected to at least  $k$  other nodes in the subgraph.

Similarly, the  $k$ -dense decomposition [10] of a graph is a set of nested subgraphs induced by edges of the same  $k$ -denseness. An edge has  $k$ -denseness equal to  $k$  if it belongs to a maximal connected subgraph of the original graph, in which all edges have multiplicity [7, 8, 11] at least  $k - 1$ , i.e., in which each pair of connected nodes has at least  $k - 1$  common neighbors in the subgraph.

Both the  $k$ -core and  $k$ -dense decompositions rely on the analysis of local properties of nodes and edges. However, due to the recursive nature of these decompositions, the  $dk$ -distributions with  $d = 0, 1, 2, 2.1, 2.5$  do not exactly fix either the  $k$ -core or  $k$ -dense distributions.

### 1.7 Betweenness

Betweenness  $b(i)$  of node  $i$  is a measure of how ‘‘important’’  $i$  is in terms of the number of shortest paths passing through it. Formally, if  $\sigma_{st}(i)$  is the number of shortest paths between nodes  $s \neq i$  and  $t \neq i$  that pass through  $i$ , and  $\sigma_{st}$  is the total number of shortest paths between the two nodes  $s \neq t$ , then betweenness of  $i$  is

$$b(i) = \sum_{s,t} \frac{\sigma_{s,t}(i)}{\sigma_{s,t}}. \quad (18)$$

Averaging over all nodes of degree  $k$ , degree-dependent betweenness  $\bar{b}(k)$  is

$$\bar{b}(k) = \sum_{i: \deg(i)=k} \frac{b(i)}{N(k)}. \quad (19)$$



### 1.8 Shortest path distance

The distance distribution is the distribution of hop-lengths of shortest path between nodes in a network. Formally, if  $N(h)$  is the number of node pairs located at hop distance  $h$  from each other, then the distance distribution  $P(h)$  is

$$P(h) = \frac{N(h)}{N(N-1)/2}, \quad (20)$$

where  $N(N-1)/2$  is the total number of nodes pairs in the network. The average distance is:

$$\bar{h} = \sum_h P(h). \quad (21)$$

Finally, the network diameter, i.e., the maximum hop distance between nodes in the network, is

$$d = \max(h). \quad (22)$$

### 1.9 Spectral properties

The adjacency matrix of graph  $A$  gives the full information on the structure of the graph. The largest eigenvalue of  $A$  and the spectral gap, which is defined as the difference between the largest and second largest eigenvalue  $A$ , play important roles in the dynamic processes on networks. For instance, the largest eigenvalue of the adjacency matrix is related to the speed of the spreading processes on the network [12, 13], while the gap determines the speed of convergence of the random walk to its steady state [14].

The Laplacian matrix describes the diffusion of a random walker on the network and is defined as  $L = D - A$ , where  $D$  is the diagonal matrix of degrees  $D_{ij} = \delta_{ij}k_i$ ,  $\delta_{ij}$  is Kronecker delta and  $k_i$  is the degree of node  $i$ . The smallest eigenvalue of the Laplacian matrix is associated to stationary distribution of random walker and it is always equal to zero, while the smallest non-zero eigenvalue, Fiedler value, defines the time scale of the slowest mode of the diffusion [14].

## Supplementary Note 2: Considered networks

We apply the  $dk$ -series analysis to the following six social, biological, language, communication, and transportation networks, Table 3:

- AIR. The US air transportation network [1]. The nodes are airports, and there is a link between two airports if there is a direct flight between them.
- BRAIN. The largest connected component of an fMRI map of the human brain [2]. The nodes are voxels (small areas of a resting brain of approximately  $36\text{mm}^3$  volume each), and two voxels are connected if the correlation coefficient of the fMRI activity of the voxels exceed 0.7.

- **WORDS.** The largest connected component of the network of adjacent words in Charles Darwin’s “The Origin of Species” [3]. The nodes are words, and two words are connected if they are adjacent in the text.
- **INTERNET.** The topology of the Internet at the level of Autonomous Systems (ASes) [4]. The nodes are ASs (organizations owning parts of the Internet infrastructure), and there is a link between two ASs if they have a business relationship to exchange Internet traffic.
- **PGP** (considered in the main text). The largest strongly connected component of the technosocial web of trust relationships among people extracted from the Pretty Good Privacy (PGP) data [5]. The nodes are PGP certificates of users, and there is a link between two certificates if their users mutually trust each other’s certificate/user associations.
- **PPI.** The largest connected component of the human protein interaction network [6]. The nodes are proteins, and there is a link between two proteins if they interact.

Table 4 reports the parameters used for each network in the  $dk$ -randomization and  $p$ -targeting  $dk$ -preserving rewiring processes.

### Supplementary Note 3: Results

**Degree distribution.** We observe in Fig. 1 that while  $0k$ -randomizations are way off, the  $dk$ -random graphs with  $d \geq 1$  reproduce the degree distributions in the real networks exactly, which is by definition: the  $1k$ -distribution is the degree distribution, and  $dk$ -random graphs with  $d \geq 1$  have exactly the same degree distributions as the real networks.

**Average nearest neighbor degree (ANND).** We observe in Fig. 2 that while  $0k$ -randomizations are way off, the  $1k$ -random graphs tend to be closer to the real networks in terms of ANND, whereas the  $dk$ -random graphs with  $d \geq 2$  have exactly the same average neighbor degrees as the real networks, which is again by definition: the  $dk$ -random graphs with  $d \geq 2$  have exactly the same JDD  $P(k, k')$  as the real networks. In the WORDS, INTERNET, and PPI cases, the ANNDs  $\bar{k}_{nn}(k)$  even in the  $1k$ -random graphs do not noticeably differ from the ANNDs in the real networks.

**Clustering.** We observe in Fig. 3 that degree-dependent average clustering in the  $2.5k$ -random graphs matches the one in the real networks, which is again by definition. For  $d < 2.5$ , degree-dependent clustering differs sensibly in many cases. However, degree-dependent clustering in the AIR network does not exhibit noticeable differences with its  $2.1k$ -randomizations, while in the WORDS case, even the  $1k$ -random graphs reproduce degree-dependent clustering nearly exactly.

**Subgraph frequencies.** We observe in Fig. 4 that the  $2k$ -random graphs reproduce the subgraphs frequencies in most cases, but the BRAIN and PGP require  $d = 2.5$  to reproduce these frequencies.

**Common neighbors.** We observe in Fig. 5 that the  $1k$ -random graphs reproduce the common neighbor distributions in all the cases except the BRAIN, which requires  $d = 2$ , and PGP, which requires  $d = 2.5$ .

**$k$ -coreness and  $k$ -denseness.** We observe in Fig. 6 that the  $2k$ -random graphs reproduce the  $k$ -coreness distributions in all the networks except the PGP and BRAIN that require  $d = 2.5$ . We observe in Fig. 7 that the  $2.5k$ -random graphs reproduce the  $k$ -denseness distributions in all the networks. The  $k$ -denseness distributions in the AIR and WORDS networks are reproduced even by their  $2k$ -random graphs.

**Betweenness.** We observe in Fig. 8 that betweenness in the BRAIN network cannot be approximated even by its  $2.5k$ -random graphs. The INTERNET lies at the other extreme: even the  $1k$ -random graphs reproduce its betweenness. The PGP network requires all the constraints imposed by the  $2.5k$ -distribution, while betweenness in all the other networks is similar to betweenness in their  $2k$ -random graphs.

**Shortest path distance.** We observe in Fig. 9 that the distance distributions in the INTERNET and WORDS networks are correctly reproduced by their  $1k$ -random graphs. Even  $d = 2.5$  is not enough for the BRAIN, while the same value of  $d = 2.5$  suffices for all the networks.

**Spectral properties.** We observe in Table 1 that the largest eigenvalue of the adjacency matrix is closely, although not exactly, reproduced by  $d = 2.5k$ -random graphs for all six networks. Furthermore, we observe that the largest eigenvalues for  $2k$ -random graphs of AIR and WORDS networks are very close to the eigenvalues of the original networks.

The values of the spectral gaps for  $2.5k$ -random graphs shown in Table 2 are relatively close to the values observed for the original networks, with relative difference for AIR, BRAIN and WORDS networks around 5%. The large values of the spectral gaps for  $2k$  and  $2.1k$ -random graphs indicate that they are more robust, in the sense of being better connected and interlinked, compared to the original networks.

**Kolmogorov-Smirnov distance.** In Fig. 10 we quantify the convergence of  $dk$ -series in terms of Kolmogorov-Smirnov (KS) distances between the distributions of per-node values of a given property in the real networks and the same distributions in their  $dk$ -random graphs. We report the KS distances for the following properties:

**k** degree, cf. Fig. 1;

**knn** ANND, cf. Fig. 2;

**c** clustering, cf. Fig. 3;

**comm.neigh** common neighbors, cf. Fig. 5;

**kcore**  $k$ -coreness, cf. Fig. 6;

**kdense**  $k$ -density, cf. Fig. 7;

**bet** betweenness, cf. Fig. 8;

**path-len** shortest path distance, cf. Fig. 9.

The Kolmogorov-Smirnov distance between two cumulative distribution functions (CDFs)  $F_1(x)$  and  $F_2(x)$  is

$$D = \sup_x |F_1(x) - F_2(x)|. \quad (23)$$

In our case,  $F_1(x)$  is the per-node CDF of a given property in a real network, and  $F_2(x)$  is the per-node CDF for the same property computed across all different  $dk$ -random graph realizations for the network with a given  $d$ . We note that the KS distances provides more detailed statistics than the  $dk$ -distributions, because the latter do not differentiate between nodes of the same degree, while the former do. For example, even if the  $2k$ -distributions and consequently ANNDs  $\bar{k}_{nn}(k)$  in two different networks are exactly the same, the distributions of average degrees  $\bar{k}_{i,nn}$  of neighbors of each individual node  $i$ ,  $i = 1, \dots, N$ , are in general different, so that the KS distance between the two per-node ANND CDFs is in general greater than zero.

## Supplementary Discussion

We compare  $dk$ -series with the series based on subgraph frequencies, and show that the latter cannot form a systematic basis for topology analysis.

The difference between  $dk$ -series and subgraph-based-series, which we can call  $d$ -series, is that the former is the series of distributions of  $d$ -sized subgraphs labeled with node degrees in a given network, while the  $d$ -series is the distributions of such subgraphs in which this degree information is ignored. This difference explains the mnemonic names for these two series: ‘ $d$ ’ in ‘ $dk$ ’ refers to the subgraph size, while ‘ $k$ ’ signifies that they are labeled by node degrees—‘ $k$ ’ is a standard notation for node degrees.

This difference between the  $dk$ -series and  $d$ -series is crucial. The  $dk$ -series are inclusive, in the sense that the  $(d+1)k$ -distribution contains the full information about the  $dk$ -distribution, plus some additional information, which is not true for  $d$ -series.

To see this, let us consider the first few elements of both series in Table 5. In Supplementary Note 1 we show explicitly how the  $(d+1)k$ -distributions define the  $dk$ -distribution for  $d = 0, 1, 2$ . The key observation is that the  $d$ -series does not have this property. The 0'th element of  $d$ -series is undefined. For  $d = 1$  we have the number of subgraphs of size 1, which is just  $N$ , the number of nodes in the network. For  $d = 2$ , the corresponding statistics is  $M$ , the number of links, subgraphs of size 2. Clearly,  $M$  and  $N$  are independent statistics, and the former does not define the latter. For  $d = 3$ , the statistics are  $W$  and  $T$ , the total number of wedges and triangles, subgraphs of size 3, in the network. These do not define the previous element  $M$  either. Indeed, consider the following two networks of size  $N$ —the chain and the star:

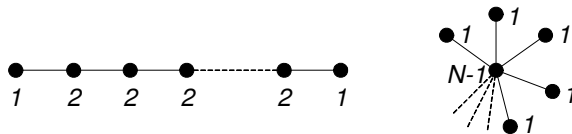

There are no triangles in either network,  $T = 0$ . In the chain network, the number of wedges is  $W = N - 2$ , and in the star  $W = (N - 1)(N - 2)/2$ . We see that even though  $W$  ( $d = 3$ ) scales completely differently with  $N$  in the two networks, the number of edges  $M = N - 1$  ( $d = 2$ ) is the same.

In summary,  $d$ -series is not inclusive. For each  $d$ , the corresponding element of the series reflects a different kind of statistical information about the network topology, unrelated or only loosely related to the information conveyed by the preceding elements. At the same time, similar to  $dk$ -series, the  $d$ -series is also converging since at  $d = N$  it specifies the whole network topology. However, this convergence is much slower than in the  $dk$ -series case. In the two networks considered above, for example, neither  $W = N - 2$ ,  $T = 0$  nor  $W = (N - 1)(N - 2)/2$ ,  $T = 0$ , fix the network topology as there are many non-isomorphic graphs with the same  $(W, T)$  counts, whereas the  $3k$ -distributions  $N_{\wedge}(1, 2, 2) = 2$ ,  $N_{\wedge}(2, 2, 2) = N - 4$  and  $N_{\wedge}(1, N - 1, 1) = (N - 1)(N - 2)/2$  define the chain and star topologies exactly.

The node degrees thus provide necessary information about subgraph locations in the original network, which significantly speeds up convergence as a function of  $d$ , and more importantly makes the  $dk$ -series basis inclusive and systematic.

## Supplementary Methods

The methods that we use to sample  $dk$ -random graphs for a given graph representing a real network are based on two different rewiring processes:  $dk$ -randomizing rewiring ( $d = 0, 1, 2$ ) and  $p$ -targeting  $dk$ -preserving rewiring ( $p = 2.1k, 2.5k$ ).

The first method ( **$dk$ -randomization**) consists of swapping random pairs of edges in the original network preserving its  $dk$ -distribution, Algorithm 1. The following three input parameters are required:  $G_T$  the original graph,  $R$  the

number of rewirings to apply, and  $d$  index that indicates the  $dk$ -distribution to preserve. The random edge selection function on line 4 and the rewiring function on line 5 depend on  $d$  as follows:

- if  $d = 0$ , random edge  $(i, j)$  and non-edge  $(a, b)$  (disconnected nodes  $a$  and  $b$ ) are selected, and the rewiring consists of removing edge  $(i, j)$  and adding edge  $(a, b)$ .
- if  $d = 1$ , two random edges  $(i, j)$  and  $(a, b)$  are selected and discarded if either edge  $(i, b)$  or edge  $(j, a)$  exists; if neither edge  $(i, b)$  nor edge  $(j, a)$  exists, the rewiring consists of removing edges  $(i, j)$  and  $(a, b)$ , and adding edges  $(i, b)$  and  $(j, a)$ .
- if  $d = 2$ , two random edges  $(i, j)$  and  $(a, b)$  such that degrees  $k_i = k_a$  are selected and discarded if either edge  $(i, b)$  or edge  $(j, a)$  exists; if neither edge  $(i, b)$  nor edge  $(j, a)$  exists, the associated rewiring consists of removing edges  $(i, j)$  and  $(a, b)$  and adding edges  $(i, b)$  and  $(j, a)$ .

---

**Supplementary Algorithm 1:**  $dk$ -randomization process.

---

```

Input:  $G_T$ ; // Original graph
Input:  $R$ ; // Number of rewirings
Input:  $d$ ; //  $d$  value: 0, 1, or 2
/* 1. Initialize process variables */
1  $i = 0$ ; // Rewiring counter
2  $G_0 = G_T$ ; // Graph to rewire
/* 2. Apply  $R$   $dk$ -rewirings */
3 while  $i < R$  do
    /* Select a random pair of edges (see the text) */
    4  $rew = \text{random}(\text{edges} \in G_i)$ ;
    /* Apply the rewiring to  $G_i$  */
    5  $\text{apply\_rewiring}(G_i, rew)$ ;
    6  $i = i + 1$ ;
Output:  $G_i$ ; //  $dk$ -randomized graph

```

---

The second method of ( **$p$ -targeting  $dk$ -preserving rewiring**) is based on simulated annealing, and consists of two phases: randomization and targeting rewiring, Algorithm 2. The following input parameters are required:  $G_T$  the original graph,  $p_{G_T}$  the property to target,  $R$  the number of  $dk$ -rewirings to apply at each value of temperature,  $\beta_0$  the initial inverse temperature,  $\beta_{factor}$  the rate of temperature decrease, and  $\alpha$  the acceptance threshold. In the first phase the original graph is  $2k$ -randomized by Algorithm 1. In the second phase, the obtained  $2k$ -random graph is  $2k$ -rewired, but each rewiring is accepted with probability  $\min[\exp(-\beta H), 1]$  which depends on current values of energy  $H$  and temperature  $1/\beta$ . Energy is defined as the distance between the values of property  $p$  in the original and current rewired graphs. Temperature is high initially, but each round of  $R$  rewirings (line 9), it decreases by factor  $\beta_{factor}$ , thus decreasing the probability of accepting a rewiring that increases energy. This

second phase terminates when either energy is zero, meaning that the value of  $p$ -property in the rewired graph  $p_{G_i}$  is equal to its value in the original graph  $p_{G_T}$ , or when the percentage of accepted rewirings during the last round falls below a user-specified threshold  $\alpha$ . Function `compute_property( $G$ )` appearing on lines 3 and 12 returns average clustering  $\bar{c}$  or average degree-dependent clustering  $\bar{c}(k)$  of  $G$  depending on whether  $d = 2.1$  or  $d = 2.5$ , respectively. Energy function `distance( $p_{G_i}, p_{G_T}$ )` appearing on lines 4 and 13 depends on  $d$  as follows:

- if  $d = 2.1$ , `distance( $p_{G_i}, p_{G_T}$ )` =  $|\bar{c}_{G_i} - \bar{c}_{G_T}|$ ,
- if  $d = 2.5$ , `distance( $p_{G_i}, p_{G_T}$ )` =  $\sum_k |\bar{c}_{G_i}(k) - \bar{c}_{G_T}(k)|$ .

**Code availability** We release the software package that implements the  $dk$ -randomization algorithms described above. The code is freely available at <http://polcolomer.github.io/RandNetGen/>[15].

---

**Supplementary Algorithm 2:**  $p$ -targeting  $dk$ -preserving rewiring process.

---

```

Input:  $G_T$ ; // Original graph
Input:  $R$ ; // Number of rewirings
Input:  $p_{G_T}$ ; // Target value of the property
Input:  $\beta_0$ ; // Initial inverse temperature
Input:  $\beta_{factor}$ ; // Temperature decrease rate
Input:  $\alpha$ ; // Acceptance threshold
/* 1.  $2k$ -randomize the original graph using Alg. 1 */
1  $M = \text{num.edges}(G_T)$ ;
2  $G_0 = dk\text{-randomize}(G_T, R = 100M, d = 2)$ ;
/* 2. Compute the current value of the property */
3  $p_{G_0} = \text{compute\_property}(G_0)$ ;
/* 3. Compute the current energy, the distance between  $p_{G_0}$  and  $p_{G_T}$  */
4  $H_0 = \text{distance}(p_{G_0}, p_{G_T})$ ;
/* 4. Initialize process variables */
5  $i = 0$ ; // Accepted rewirings counter
6  $\text{step} = 0$ ; // Counter associated with current temperature
7  $\beta_{\text{step}} = \beta_0$ ;
8  $A_{\text{step}} = 1$ ; // Acceptance ratio, percentage of accepted rewirings that
modified energy at current temperature
/* 5.  $2k$ -rewire until energy goes to zero or the acceptance ratio falls
below the threshold */
9 while  $H_i > 0$  and  $A_{\text{step}} > \alpha$  do
/* Apply  $R$   $p$ -targeting  $2k$ -rewirings at constant temperature  $1/\beta_{\text{step}}$  */
10 for  $r \leftarrow 1$  to  $R$  do
/* Apply a single  $2k$ -rewiring to the current graph, using Alg. 1 */
11  $G_{hyp} = dk\text{-randomize}(G_i, 1, 2)$ ;
12  $p_{hyp} = \text{compute\_property}(G_{hyp})$ ;
/* Compute current energy */
13  $H_{hyp} = \text{distance}(p_{hyp}, p_{G_T})$ ;
/* Compute energy change */
14  $\Delta H = H_{hyp} - H_i$ ;
/* Accept graph  $G_{hyp}$  with the following probability */
15 with probability  $\min(e^{-\beta_{\text{step}} \cdot \Delta H}, 1)$  do:
16  $r = r + 1$ ;
17  $i = i + 1$ ;
18  $G_i = G_{hyp}$ ;
19  $H_i = H_{hyp}$ ;
20  $\beta_{\text{step}+1} = \beta_{\text{step}} \cdot \beta_{factor}$ ; // Update  $\beta$ 
21  $A_{\text{step}+1} = \frac{\#\text{rewirings accepted with } \Delta H \neq 0}{\#\text{rewirings with } \Delta H \neq 0}$ ; // Update the acceptance ratio
22  $\text{step} = \text{step} + 1$ ;
Output:  $G_i$ 

```

---



## Supplementary References

- [1] Vittoria Colizza, Romualdo Pastor-Satorras, and Alessandro Vespignani. Reaction-diffusion Processes and Metapopulation Models in Heterogeneous Networks. *Nat Phys*, 3:276–282, 2007. doi:10.1038/nphys560.
- [2] Victor Eguíluz, Dante Chialvo, Guillermo Cecchi, Marwan Baliki, and A. Vania Apkarian. Scale-Free Brain Functional Networks. *Phys Rev Lett*, 94(1):018102, January 2005. doi:10.1103/PhysRevLett.94.018102.
- [3] R Milo, S Itzkovic, N Kashtan, R Levitt, S Shen-Orr, I Ayzenshtat, M Sheffer, and U Alon. Superfamilies of Evolved and Designed Networks. *Science*, 303:1538–1542, 2004. doi:10.1126/science.1089167.
- [4] Priya Mahadevan, Dmitri Krioukov, Marina Fomenkov, Bradley Huffaker, Xenofontas Dimitropoulos, Kc Claffy, and Amin Vahdat. The Internet AS-Level Topology: Three Data Sources and One Definitive Metric. *Comput Commun Rev*, 36(1):17–26, 2006. doi:10.1145/1111322.1111328.
- [5] Marián Boguñá, Romualdo Pastor-Satorras, Albert Díaz-Guilera, and Alex Arenas. Models of social networks based on social distance attachment. *Phys Rev E*, 70(5):056122, November 2004. doi:10.1103/PhysRevE.70.056122.
- [6] Thomas Rolland, Murat Tas, Nidhi Sahni, Song Yi, Irma Lemmens, Celia Fontanillo, Roberto Mosca, Atanas Kamburov, Susan D Ghiassian, Xinpeng Yang, Lila Ghamsari, Dawit Balcha, Bridget E Begg, Pascal Braun, Marc Brehme, Martin P Broly, Anne-ruxandra Carvunis, Dan Converyzupan, Roser Corominas, Changyu Fan, Eric Franzosa, Jasmin Coulombe-huntington, Elizabeth Dann, Matija Dreze, Fana Gebreab, Bryan J Gutierrez, Madeleine F Hardy, Mike Jin, Shuli Kang, Ruth Kiros, Guan Ning Lin, Ryan R Murray, Alexandre Palagi, Matthew M Poulin, Katja Luck, Andrew Macwilliams, Xavier Rambout, John Rasla, Patrick Reichert, Viviana Romero, Elien Ruysinck, Julie M Sahalie, Annemarie Scholz, Akash a Shah, Amitabh Sharma, Yun Shen, Kerstin Spirohn, Stanley Tam, Alexander O Tejada, Shelly a Trigg, Jean-claude Twizere, Kerwin Vega, and Jennifer Walsh. A Proteome-Scale Map of the Human Interactome Network. *Cell*, 159:1212–1226, 2014. doi:10.1016/j.cell.2014.10.050.
- [7] M. Ángeles Serrano and Marián Boguñá. Clustering in complex networks. I. General formalism. *Phys Rev E*, 74(5):056114, November 2006. doi:10.1103/PhysRevE.74.056114.
- [8] M. Ángeles Serrano and Marián Boguñá. Clustering in complex networks. II. Percolation properties. *Phys Rev E*, 74(5):056115, August 2006. doi:10.1103/PhysRevE.74.056115.

- [9] José Alvarez-Hamelin, Luca Dall’Asta, Alain Barrat, and Alessandro Vespignani. K-core decomposition of Internet graphs: hierarchies, self-similarity and measurement biases. *Networks Heterog Media*, 3(2):371–393, March 2008. doi:10.3934/nhm.2008.3.371.
- [10] Kazumi Saito and Takeshi Yamada. Extracting Communities from Complex Networks by the k-dense Method. In *Sixth IEEE Int Conf Data Min - Work*, pages 300–304. IEEE, 2006. doi:10.1109/ICDMW.2006.76.
- [11] Vinko Zlatić, Diego Garlaschelli, and Guido Caldarelli. Networks with arbitrary edge multiplicities. *EPL*, 97(2):28005, January 2012. doi:10.1209/0295-5075/97/28005.
- [12] Yang Wang, Deepayan Chakrabarti, Chenxi Wang, and Christos Faloutsos. Epidemic spreading in real networks: An eigenvalue viewpoint. In *Proceedings of the 22nd International Symposium on Reliable Distributed Systems*, pages 25–34. IEEE, 2003. doi:10.1109/RELDIS.2003.1238052.
- [13] Gregorio D’Agostino, Antonio Scala, Vinko Zlatić, and Guido Caldarelli. Robustness and assortativity for diffusion-like processes in scale-free networks. *EPL*, 97(6):68006, 2012. doi:10.1209/0295-5075/97/68006.
- [14] Piet Van Mieghem. *Graph spectra for complex networks*. Cambridge University Press, Cambridge, 2010.
- [15] Pol Colomer de Simon. RandNetGen: a Random Network Generator. URL: <http://polcolomer.github.io/RandNetGen/>.
